# Supplementary material for: Comparative analyses of the in vivo induction and transmission of α-synuclein pathology in transgenic mice by MSA brain lysate and recombinant α-synuclein fibrils
Source: PubMed Central journal article supplement (PMC6526622; doi:10.1186/s40478-019-0733-3), 2019-05-20
Supplement: 40478_2019_733_MOESM1_ESM.pdf [file 40478_2019_733_MOESM1_ESM.pdf]

**nTg**

**M20<sup>+/-</sup>**

**M83<sup>+/-</sup>**

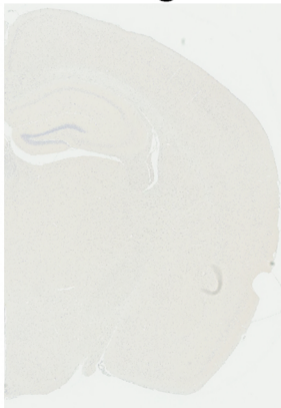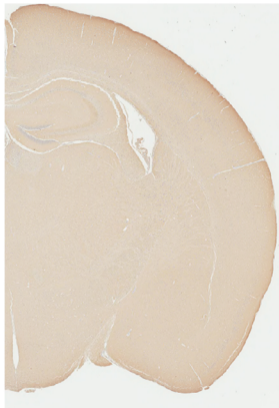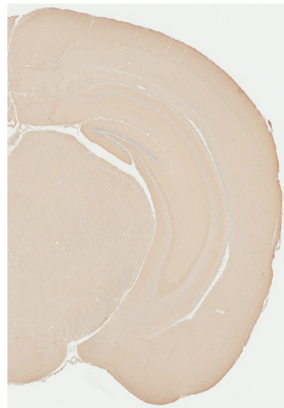

**33A-3F3**

**Supplemental Figure 1**
