# Supplementary material for: Comparative analyses of the in vivo induction and transmission of α-synuclein pathology in transgenic mice by MSA brain lysate and recombinant α-synuclein fibrils
Source: PubMed Central journal article supplement (PMC6526622; doi:10.1186/s40478-019-0733-3), 2019-05-20
Supplement: 40478_2019_733_MOESM2_ESM.pdf [file 40478_2019_733_MOESM2_ESM.pdf]

**A**WT  $\alpha$ S  
Fibrils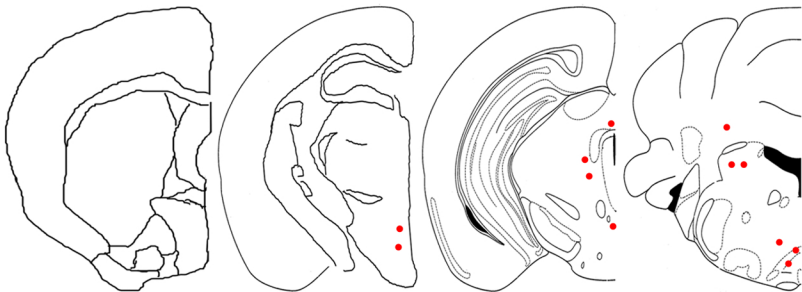A53T  $\alpha$ S  
Fibrils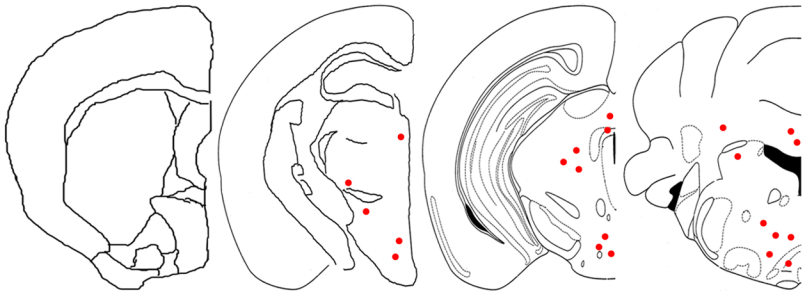MSA  
Lysate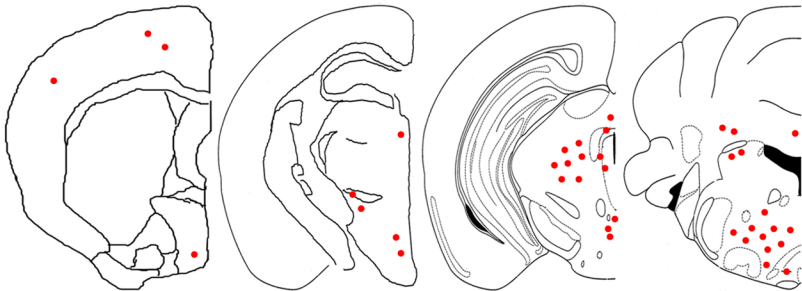**B**WT  $\alpha$ S  
Fibrils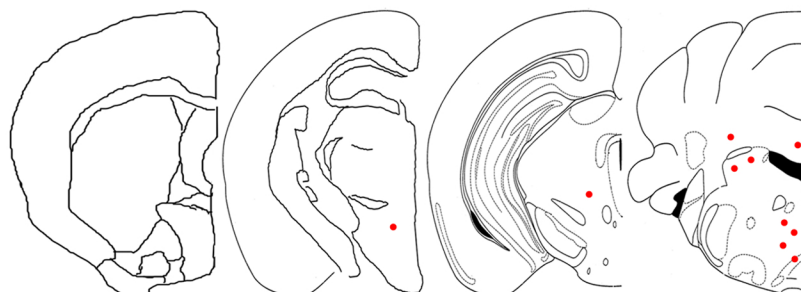A53T  $\alpha$ S  
Fibrils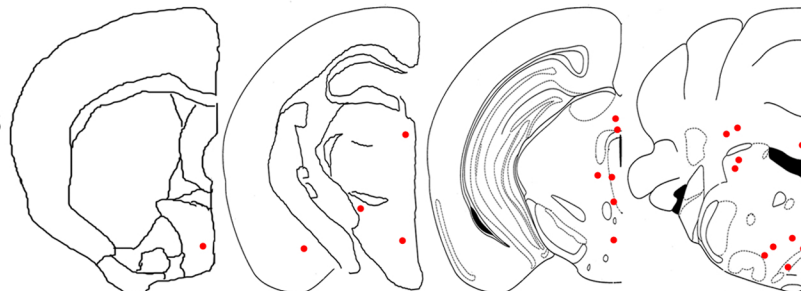MSA  
Lysate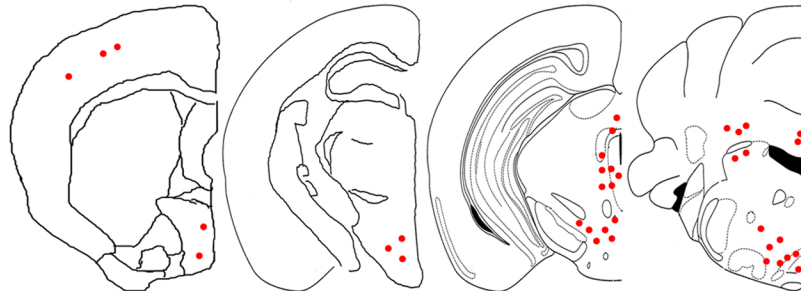**Supplemental Figure 2**
